# Supplementary material for: Decrease of 5-hydroxymethylcytosine and TET1 with nuclear exclusion of TET2 in small intestinal neuroendocrine tumors
Source: Springer Nature journal article supplement (doi:10.1186/s12885-018-4579-z), 2018-07-25
Supplement: MOESM1 [file 15978200]

Table S1. Clinical data for patients with SI-NETs

| Patient no. | Gender | Liver tumor load * | Extrahepatic metastases | Peritoneal carcinomatosis | Carcinoid heart disease | U-5-HIAA | CGA  | Ki67 at diagnosis (%) | ENETS grading | Survival (follow up years) | Status | SSA * | PRRT * | Interferon | Stage at diagnosis | Liver surgery | Liver metastases * |
|-------------|--------|--------------------|-------------------------|---------------------------|-------------------------|----------|------|-----------------------|---------------|----------------------------|--------|-------|--------|------------|--------------------|---------------|--------------------|
| 1           | Female | 2                  | Yes                     | No                        | Yes                     | 28       | NA   | 1                     | 1             | 2.7                        | DWD    | 1     | 0      | 0          | 4                  | 1             | 1                  |
| 2           | Male   | 0                  | No                      | Yes                       | No                      | 84       | 18.3 | 3                     | 2             | 5.1                        | AWD    | 1     | 0      | 0          | 4                  | 0             | 1                  |
| 3           | Male   | 2                  | No                      | No                        | No                      | 405      | NA   | 2                     | 1             | 3.5                        | AWD    | 1     | 0      | 0          | 4                  | 1             | 1                  |
| 4           | Male   | 0                  | No                      | No                        | No                      | 41       | 4.6  | 1                     | 1             | 2.8                        | AWD    | 1     | 0      | 0          | 3b                 | 0             | 2                  |
| 5           | Male   | 2                  | Yes                     | No                        | No                      | 165      | 47   | 1                     | 1             | 2.3                        | AWD    | 1     | 1      | 0          | 4                  | 0             | 1                  |
| 6           | Male   | 0                  | No                      | No                        | No                      | 66       | 9.1  | 2                     | 1             | 1                          | AWD    | 1     | 0      | 0          | 4                  | 1             | 1                  |
| 7           | Male   | 3                  | No                      | Yes                       | No                      | 468      | 23   | 1                     | 1             | 5.5                        | AWD    | 1     | 0      | 0          | 4                  | 0             | 1                  |
| 8           | Female | 0                  | No                      | No                        | No                      | NA       | NA   | 7                     | 2             | 6.8                        | DWD    | 1     | 0      | 0          | 3b                 | 0             | 0                  |
| 9           | Female | 0                  | No                      | No                        | No                      | NA       | NA   | 1                     | 1             | 3.3                        | AWOD   | 1     | 0      | 0          | 3b                 | 0             | 0                  |
| 10          | Male   | 3                  | No                      | No                        | Yes                     | 942      | NA   | 1                     | 1             | 3.3                        | AWD    | 1     | 0      | 0          | 4                  | 1             | 1                  |
| 11          | Male   | 3                  | No                      | No                        | No                      | 1564     | NA   | 4                     | 2             | 3.2                        | AWD    | 1     | 1      | 0          | 4                  | 0             | 1                  |
| 12          | Male   | 0                  | No                      | No                        | No                      | 117      | 6.3  | 2                     | 1             | 3.2                        | AWD    | 1     | 0      | 0          | 4                  | 0             | 0                  |
| 13          | Female | 2                  | No                      | No                        | No                      | 306      | NA   | 1                     | 1             | 7.8                        | AWD    | 1     | 0      | 1          | 4                  | 1             | 1                  |
| 14          | Female | 3                  | No                      | No                        | No                      | 121.5    | 7.7  | 10                    | 2             | 12                         | AWD    | 1     | 0      | 1          | 4                  | 0             | 1                  |
| 15          | Female | 2                  | No                      | Yes                       | No                      | NA       | NA   | 1                     | 1             | 8.8                        | DWD    | 1     | 0      | 1          | 4                  | 0             | 1                  |
| 16          | Female | 3                  | No                      | No                        | Yes                     | 809      | 107  | 1                     | 1             | 18.5                       | AWD    | 1     | 1      | 1          | 4                  | 0             | 1                  |
| 17          | Female | 2                  | No                      | No                        | No                      | NA       | NA   | 1                     | 1             | 11                         | AWD    | 1     | 0      | 1          | 4                  | 1             | 1                  |
| 18          | Male   | 1                  | No                      | No                        | No                      | 80       | 11.7 | 5                     | 2             | 8.6                        | DWD    | 1     | 0      | 0          | 4                  | 1             | 1                  |
| 19          | Female | 3                  | No                      | Yes                       | No                      | 1063     | 205  | 7                     | 2             | 4.3                        | DWD    | 1     | 1      | 1          | 4                  | 0             | 1                  |
| 20          | Female | 1                  | No                      | No                        | No                      | 74.4     | 10.6 | 5                     | 2             | 15.4                       | AWD    | 1     | 0      | 1          | 4                  | 1             | 1                  |
| 21          | Male   | 3                  | No                      | Yes                       | No                      | 2400     | NA   | 2                     | 1             | 0.6                        | DWD    | 0     | 0      | 1          | 3b                 | 0             | 0                  |
| 22          | Female | 3                  | Yes                     | Yes                       | Yes                     | 876      | 226  | 1                     | 1             | 4.9                        | AWD    | 1     | 0      | 1          | 4                  | 0             | 1                  |
| 23          | Female | 3                  | No                      | No                        | No                      | NA       | NA   | 1                     | 1             | 14.8                       | DWD    | 1     | 0      | 1          | 4                  | 0             | 1                  |
| 24          | Male   | 2                  | No                      | Yes                       | No                      | 87       | NA   | 17                    | 2             | 0.9                        | DWD    | 1     | 0      | 1          | 4                  | 0             | 1                  |
| 25          | Female | 0                  | No                      | No                        | No                      | NA       | NA   | 2                     | 1             | 29.9                       | DWD    | 1     | 0      | 1          | 3b                 | 1             | 2                  |
| 26          | Male   | 3                  | No                      | No                        | No                      | 192      | NA   | 5                     | 2             | 4.3                        | AWD    | 1     | 1      | 1          | 4                  | 0             | 1                  |
| 27          | Male   | 0                  | No                      | No                        | No                      | 59       | 2.7  | 1                     | 1             | 3.2                        | AWD    | 1     | 0      | 0          | 3b                 | 0             | 0                  |
| 28          | Male   | 0                  | No                      | Yes                       | No                      | 104      | 7.4  | 3                     | 1             | 3                          | AWD    | 1     | 0      | 0          | 4                  | 0             | 2                  |
| 29          | Male   | 0                  | No                      | No                        | No                      | 32       | 3    | 1                     | 1             | 0.3                        | DWOD   | 1     | 0      | 0          | 3b                 | 0             | 0                  |
| 30          | Female | 0                  | No                      | No                        | No                      | 33       | 3.9  | 3                     | 2             | 0.6                        | AWD    | 1     | 0      | 0          | 3b                 | 0             | 0                  |
| 31          | Male   | 0                  | No                      | No                        | No                      | 47       | 4.8  | 1                     | 1             | 1.3                        | AWOD   | 0     | 0      | 0          | 3b                 | 0             | 0                  |
| 32          | Male   | 0                  | No                      | No                        | No                      | NA       | NA   | 2                     | 1             | 12.9                       | AWOD   | 1     | 0      | 1          | 3b                 | 0             | 0                  |
| 33          | Female | 3                  | Yes                     | No                        | No                      | NA       | NA   | 1                     | 1             | 13.1                       | DWD    | 1     | 0      | 1          | 4                  | 0             | 1                  |
| 34          | Female | 3                  | No                      | No                        | No                      | NA       | NA   | 24                    | 3             | 3.1                        | DWD    | 1     | 0      | 1          | 4                  | 0             | 1                  |
| 35          | Female | 3                  | No                      | No                        | No                      | 134      | 14.5 | 3                     | 2             | 10.4                       | AWD    | 1     | 0      | 1          | 4                  | 1             | 1                  |
| 36          | Male   | 3                  | No                      | No                        | No                      | 379      | NA   | 2                     | 1             | 10.1                       | AWD    | 1     | 0      | 1          | 4                  | 0             | 1                  |
| 37          | Male   | 0                  | No                      | No                        | No                      | 32       | 8.2  | 1                     | 1             | 9.4                        | DWD    | 1     | 0      | 0          | 3b                 | 0             | 2                  |
| 38          | Female | 0                  | No                      | No                        | No                      | 72       | 37   | 5                     | 2             | 4.2                        | DWD    | 1     | 0      | 1          | 3b                 | 0             | 2                  |
| 39          | Male   | 0                  | No                      | No                        | No                      | NA       | NA   | 2                     | 1             | 7.8                        | AWD    | 1     | 0      | 0          | 3b                 | 0             | 0                  |
| 40          | Male   | 2                  | No                      | Yes                       | No                      | NA       | NA   | 3                     | 2             | 5.1                        | DWD    | 1     | 0      | 0          | 4                  | 0             | 1                  |

\* Liver tumor load: <5 lesions in one liver lobe = 1; 5-10 liver lesions in both liver lobes = 2; >10 liver lesions = 3; no computed tomography = 4

NA = Not available

DWD dead with disease, DWOD dead without disease, AWD alive with disease, AWOD alive without disease

\* SSA somatostatin analogue treatment

\* PRRT peptide receptor radionuclide therapy

\* Liver metastases: No = 0; synchronous = 1; metachronous = 2
